# Supplementary material for: Palygorskite Supported AuPd Alloy Nanoparticles as Efficient Nano-Catalysts for the Reduction of Nitroarenes and Dyes at Room Temperature
Source: MDPI journal article supplement (doi:10.3390/nano8121000), 2018-12-03
Supplement: s1 [file s1]

*Supplementary*

## **Palygorskite Supported AuPd Alloy Nanoparticles as Efficient Nano-Catalysts for the Reduction of Nitroarenes and Dyes at Room Temperature**

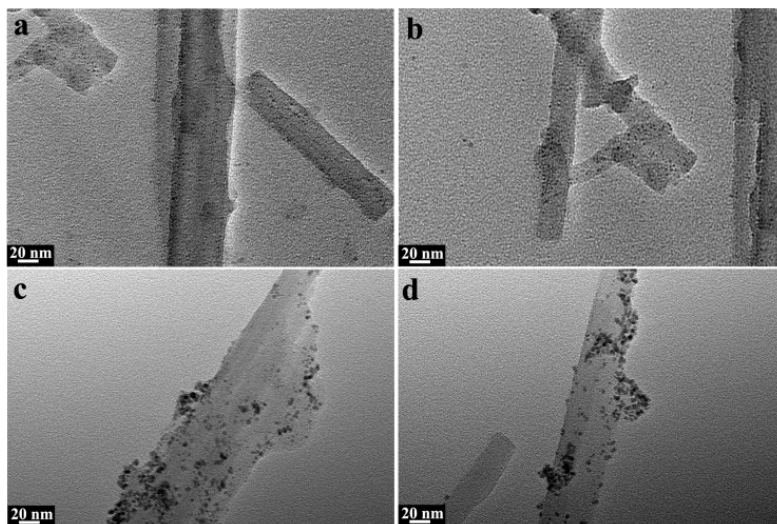

**Figure S1.** TEM images of Pal-NH<sub>2</sub>@Au (a); Pal-NH<sub>2</sub>@Pd (b); Pal-NH<sub>2</sub>@Au<sub>33</sub>Pd<sub>67</sub> (c); and Pal-NH<sub>2</sub>@Au<sub>81</sub>Pd<sub>19</sub> (d).
